# Supplementary material for: Transit Peptides From Photosynthesis-Related Proteins Mediate Import of a Marker Protein Into Different Plastid Types and Within Different Species
Source: Frontiers journal article supplement (doi:10.3389/fpls.2020.560701), 2020-09-25

**Supplementary Figure 5.** Confocal laser scanning microscopy images of wild-type and transgenic lines rice leaves. Confocal laser scanning microscopy images of wild-type (WT) rice leaves and leaves from transgenic lines transformed with *AtCAB6*<sub>TP</sub>-eGFP, *AtRCA*<sub>TP</sub>-eGFP and *AtTOCC*<sub>TP</sub>-eGFP fusions. The four panels show the individual signals for eGFP (a) chlorophyll autofluorescence (b), transmitted light (c) and the overlap of eGFP and chlorophyll autofluorescence (d). Scale bars, 20  $\mu$ m.

WT

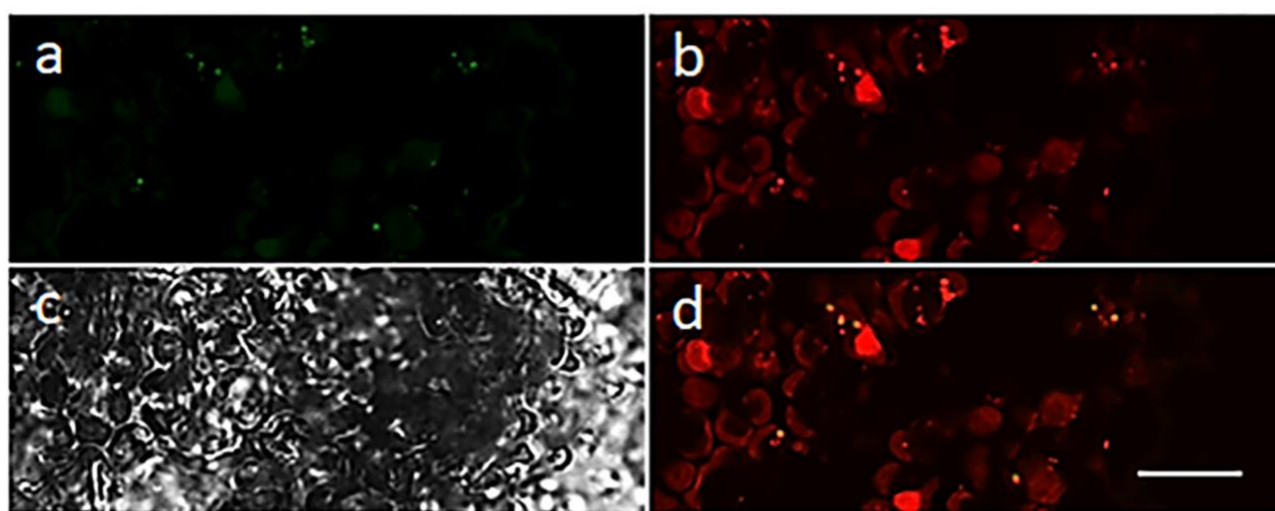

*AtCAB6*<sub>TP</sub>-eGFP

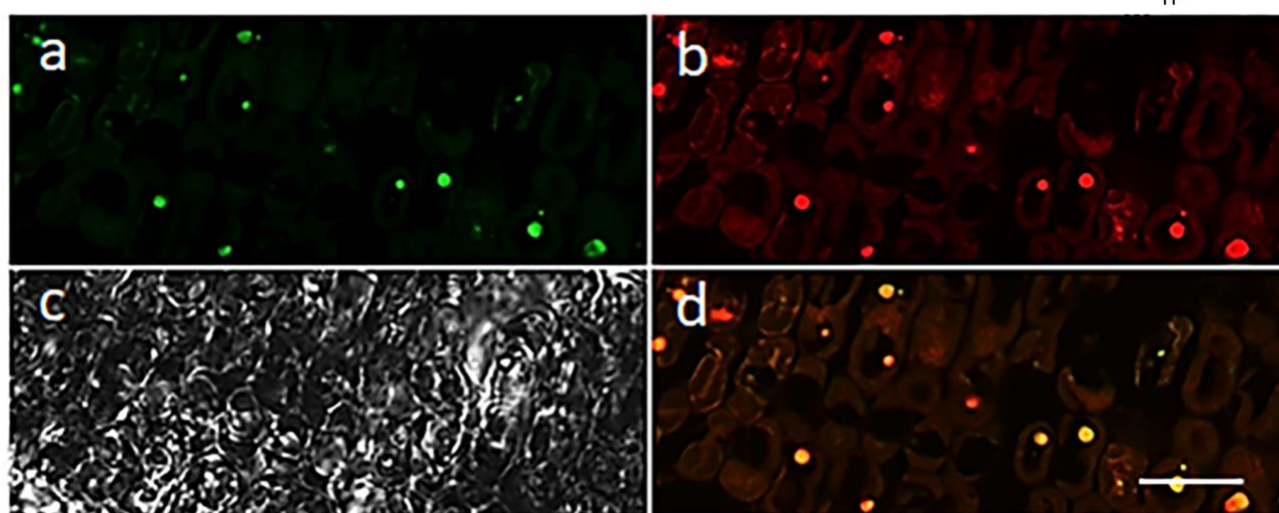

*AtTOCC<sub>TP</sub>*-eGFP

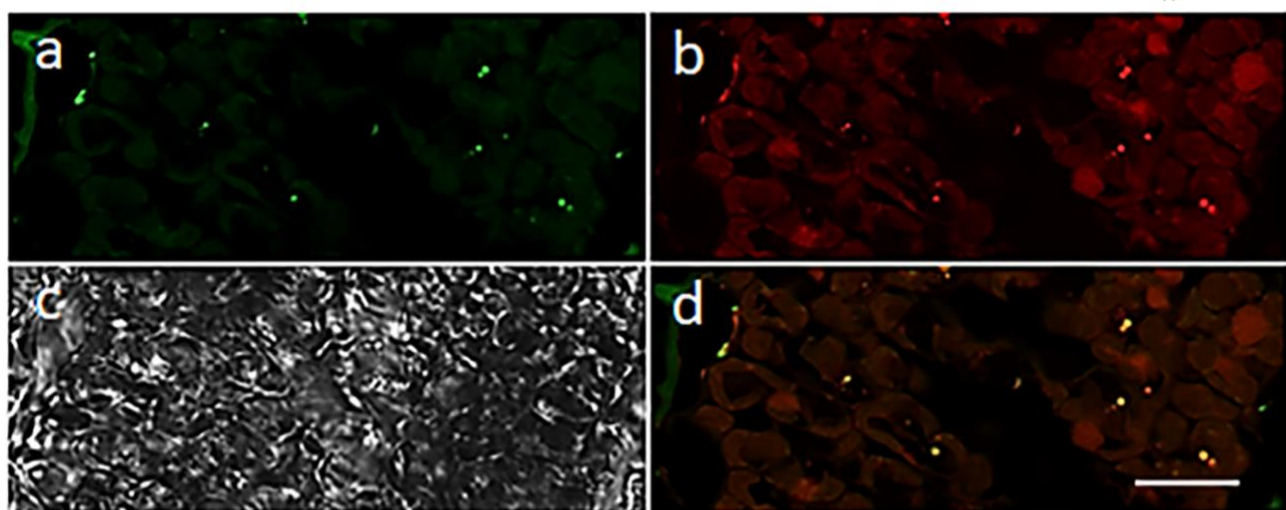

*AtRCA<sub>TP</sub>*-eGFP

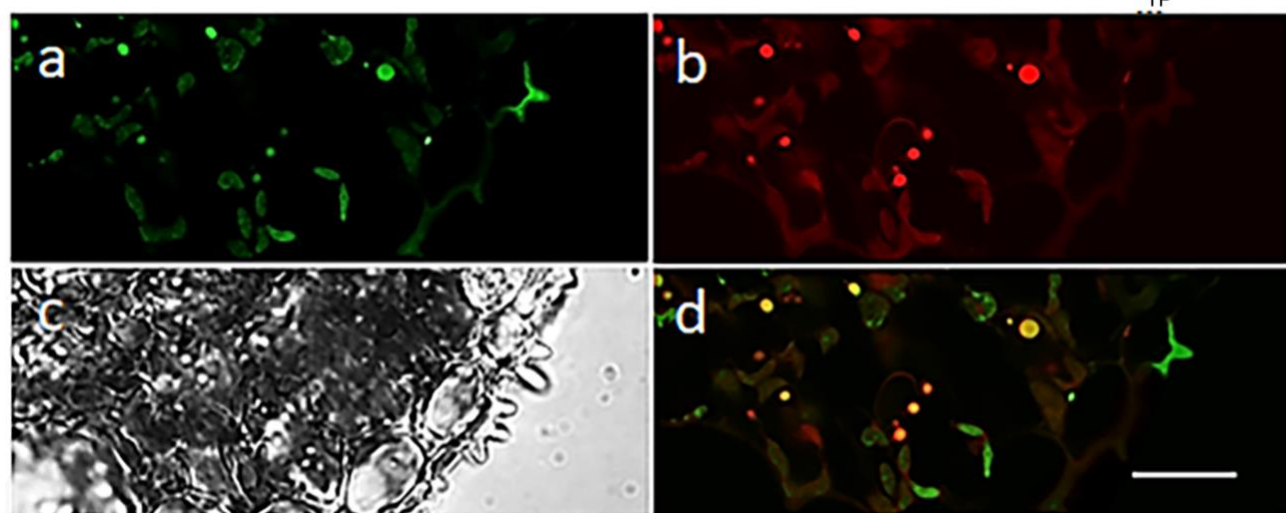

Supplement: Image_5.pdf [file Image_5.pdf]
